# Supplementary material
Source: MDPI journal article supplement (https://www.mdpi.com/2073-4433/11/4/374)
Supplement: s1 [file s1]

# Supplementary Materials: Chemical Characterization of Electronic Cigarettes (e-cigs) Refill Liquids Prior to EU Tobacco Product Directive (TPD) Adoption: Evaluation of BTEX Contamination by HS-SPME-GC-MS and Identification of Flavoring Additives by GC-MS-O

Jolanda Palmisani, Carmelo Abenavoli, Marco Famele, Alessia Di Gilio, Laura Palmieri, Gianluigi de Gennaro and Rosa Draisci

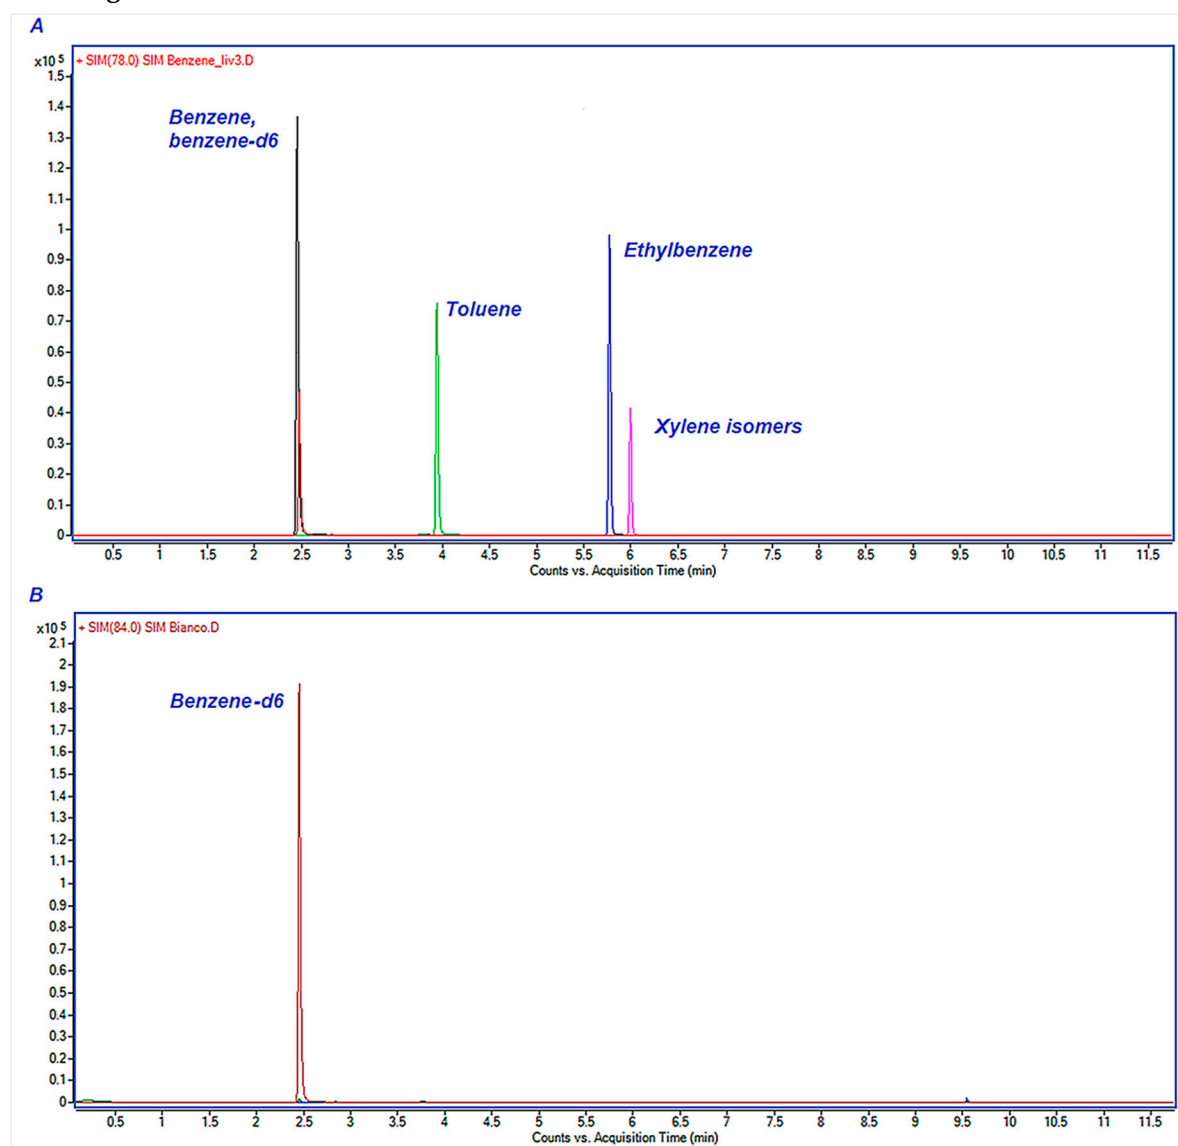

**Figure S1.** Comparison of the Chromatograms of a blank sample and a sample spiked with the BTEX standard solution (calibration level 3).
